# Supplementary material for: Flexible tri-layer piezoelectric nanogenerator based on PVDF-HFP/Ni-doped ZnO nanocomposites
Source: Royal Society of Chemistry journal article supplement (doi:10.1039/c7ra10223b), 2017-01-01
Supplement: c7ra10223b1.pdf [file c7ra10223b1.pdf]

## Supplementary Information

### **Flexible tri-layer piezoelectric nanogenerator based on PVDF-HFP/Ni-doped ZnO nanocomposites**

**Hemalatha Parangusan<sup>1</sup>, Deepalekshmi Ponnamma<sup>1\*</sup>, Mariam Al Ali AlMaadeed<sup>2</sup>**

<sup>1</sup>*Center for Advanced Materials, Qatar University, P O Box 2713, Doha, Qatar.*

<sup>2</sup>*Materials Science & Technology Program (MATS), College of Arts & Sciences, Qatar  
University, Doha 2713, Qatar*

#### **Supplementary Information 1**

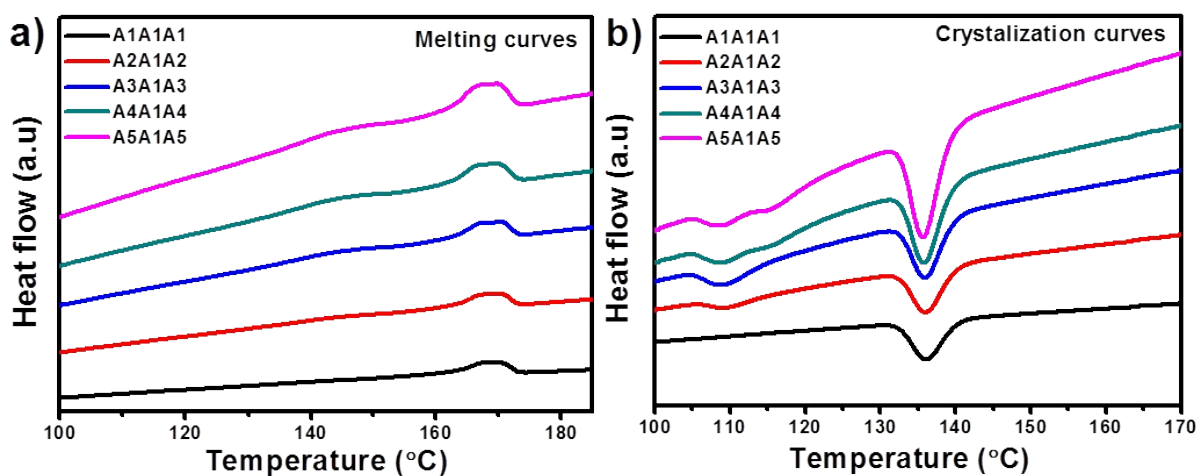

**Fig. S1:** DSC melting (a) and crystallization (b) curves of sandwiched PVDF-HFP and its nanocomposite films.

#### **Supplementary Information 2**

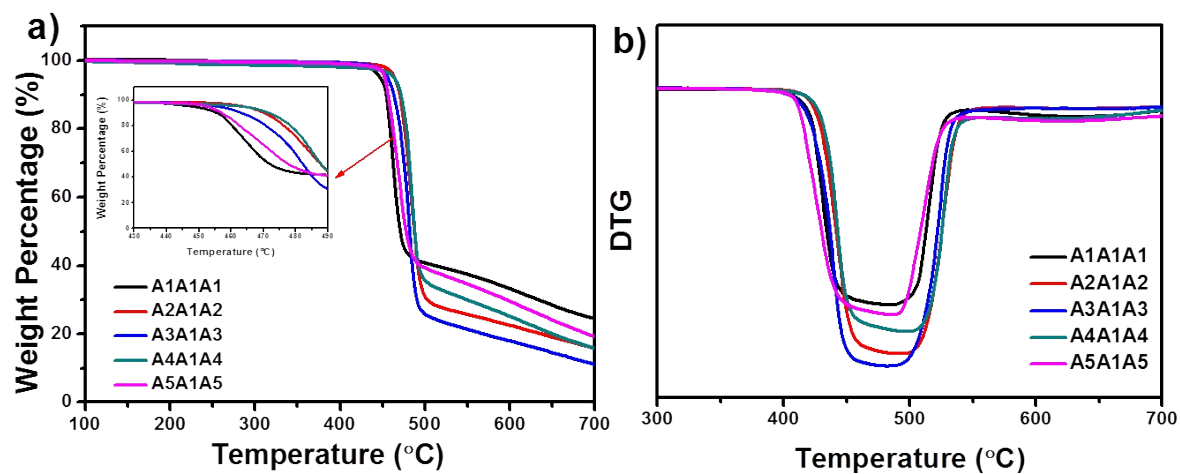

**Fig. S2:** TGA (a) and DTG (b) curves of sandwiched PVDF-HFP and its ZnO and Ni-doped ZnO nanocomposite films.
